# Supplementary material
Source: PubMed Central journal article supplement (PMC3935137)

## **Supplementary data:**

The role of BSEP gene repression in drug-induced cholestatic liver toxicity

Brandy Garzel, Hui Yang, Lei Zhang, Shiew-Mei Huang, James E. Polli, and Hongbing Wang

Drug Metabolism & Disposition

### **Supplemental Table 1**

BSEP expression changes as a percentage of DMSO, as depicted in Figure 1 are summarized, along with BSEP IC<sub>50</sub> values and reported DILI severity score. Drugs that did not meet the criteria set forth in Chen et al. (2011) and were determined not to have DILI concern are indicated by (--). Abbreviations used for DILI represent withdrawn drugs (W); DILI implicated in the box warning (BW), warnings and precautions (WP), or adverse reactions (AR) sections of label; and most DILI concern (MDC) or less DILI concern (LDC) classifications.

### **Supplemental Figure 1**

Effect of BSEP repressors on NRF2 and LRH-1 mRNA expression. Human primary hepatocytes from two donors were treated with vehicle control (0.1% DMSO) or multiple concentrations of lopinavir, troglitazone, benzbromarone, bosentan, and glimepiride as detailed in "Materials and Methods". NRF2 (A) and LRH-1 (B) mRNA expression was measured using real-time PCR.

**Table 1. Correlation between BSEP expression and DILI**

|                       | Compounds                  | Average BSEP Expression (% DMSO) | Human BSEP IC <sub>50</sub> (uM)* | DILI Severity Score** |
|-----------------------|----------------------------|----------------------------------|-----------------------------------|-----------------------|
| Represses BSEP ≥ 60%  | Lopinavir                  | 21.9 ± 9.5                       | 17.3                              | 8; WP, MDC            |
|                       | Troglitazone               | 24.2 ± 8.9                       | 5.9                               | -2; W, MDC            |
|                       | Benzbromarone              | 32.4 ± 4.2                       | 17.5                              | -2; W, MDC            |
|                       | Bosentan                   | 35.8 ± 5.9                       | 22.0                              | 7; BW, MDC            |
|                       | Glimepiride                | 39.2 ± 9.0                       | 15.7                              | 7; AR, LDC            |
| Represses BSEP 20-60% | Fenofibrate                | 42.0 ± 7.6                       | 15.3                              | 3; WP, LDC            |
|                       | Glyburide                  | 45.2 ± 3.5                       | 6.1                               | --                    |
|                       | Nelfinavir                 | 47.4 ± 6.5                       | 11.8                              | --                    |
|                       | Erythromycin estolate      | 58.8 ± 5.6                       | 13.0                              | 5; WP, MDC            |
|                       | Gefitinib                  | 59.2 ± 2.2                       | 10.9                              | --                    |
|                       | Saquinavir                 | 59.6 ± 6.0                       | 4.9                               | 3; WP, LDC            |
|                       | Ritonavir                  | 60.8 ± 8.5                       | 2.2                               | 5; WP, MDC            |
|                       | Rifampicin                 | 68.1 ± 10.4                      | 25.3                              | 8; WP, MDC            |
|                       | Cinnarizine                | 72.8 ± 12.1                      | 15.7                              | --                    |
|                       | 17-alpha ethinyl estradiol | 79.1 ± 7.0                       | 14.0                              | 2; AR, LDC            |
| Represses BSEP ≤ 20%  | Itraconazole               | 81.9 ± 20.9                      | 18.0                              | --                    |
|                       | Imatinib                   | 86.2 ± 14.3                      | 25.1                              | --                    |
|                       | Simvastatin                | 89.4 ± 8.5                       | 24.7                              | 3; WP, LDC            |
|                       | Paclitaxel                 | 95.9 ± 3.5                       | 15.0                              | --                    |
|                       | Telmisartan                | 100.9 ± 15.1                     | 16.2                              | --                    |
|                       | Pazopanib                  | 106.3 ± 13.0                     | 10.3                              | 8; BW, MDC            |
|                       | Lapatinib                  | 106.3 ± 4.0                      | 6.5                               | 8; BW, MDC            |
|                       | Indinivir                  | 107.4 ± 14.7                     | 21.2                              | 8; WP, MDC            |
|                       | Ketoconazole               | 114.6 ± 25.1                     | 3.4                               | 8; BW, MDC            |
|                       | Nefazodone                 | 118.2 ± 19.4                     | 6.1                               | 8; BW, MDC            |
|                       | Sorafenib                  | 134.4 ± 6.8                      | 8.0                               | --                    |
|                       | Fusidic Acid               | 135.5 ± 6.7                      | 10.1                              | --                    |
|                       | Pioglitazone               | 141.9 ± 13.4                     | 0.4                               | 3; WP, LDC            |
|                       | Nicardipine                | 159.4 ± 8.4                      | 7.9                               | --                    |
|                       | Cyclosporine-A             | 186.8 ± 19.4                     | 0.9                               | 2; WP, LDC            |

\*BSEP IC<sub>50</sub> values reported by Morgan et al. (2010)

\*\*DILI severity score determined by Chen et al. (2011) and the associated LTKB benchmark dataset (FDA)

Figure 1

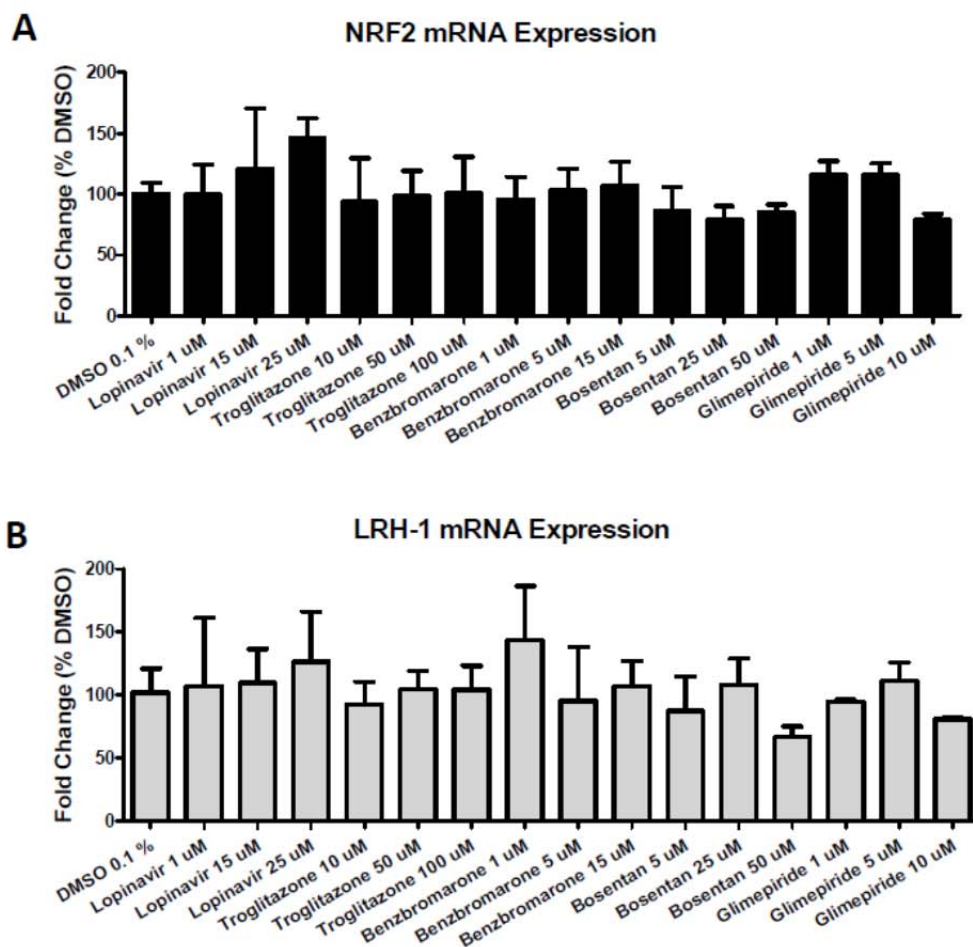

Supplement: supp_113.054189_Supplementary_data_54189.pdf [file supp_113.054189_Supplementary_data_54189.pdf]
